# Supplementary material for: An action‐oriented framework for systems‐based solutions aimed at childhood obesity prevention in US Latinx and Latin American populations
Source: PubMed Central journal article supplement (PMC8217154; doi:10.1111/obr.13241), 2021-04-07
Supplement: NIHMS1693681-supplement-Table_S1.pdf [file NIHMS1693681-supplement-Table_S1.pdf]

**Table S1.** Actions, outputs, and examples of methods and approaches for systems-based solutions for childhood obesity prevention in U.S. Latinx and Latin American populations.

| <b>Cog</b>                               | <b>Actions</b>                                                                                                                                                                                                                                                                                                                     | <b>Outputs</b>                                                                                                                                                                                                                                                                       | <b>Examples of methods and approaches</b>                                                                                                                                                                                                                                                                                                                                                                |
|------------------------------------------|------------------------------------------------------------------------------------------------------------------------------------------------------------------------------------------------------------------------------------------------------------------------------------------------------------------------------------|--------------------------------------------------------------------------------------------------------------------------------------------------------------------------------------------------------------------------------------------------------------------------------------|----------------------------------------------------------------------------------------------------------------------------------------------------------------------------------------------------------------------------------------------------------------------------------------------------------------------------------------------------------------------------------------------------------|
| Foster multisectoral team                | <ul style="list-style-type: none"> <li>- Identify stakeholders and relationships</li> <li>- Assemble a coalition</li> <li>- Build trust, respect, and cohesion</li> <li>- Define shared principles and aspirations</li> </ul>                                                                                                      | <ul style="list-style-type: none"> <li>- Solid coalition of partners</li> <li>- Community capacity initiated</li> <li>- Leadership and direction</li> <li>- Strategic roadmap</li> <li>- Culture and environment that encourage collective learning, creation, and action</li> </ul> | <ul style="list-style-type: none"> <li>- Snowball engagement</li> <li>- Team building best practices</li> <li>- Community Coalition Action Theory</li> <li>- Network analysis</li> <li>- Interview key informants</li> </ul>                                                                                                                                                                             |
| Map the system, its context, and drivers | <ul style="list-style-type: none"> <li>- Articulate the problem</li> <li>- Map factors and concepts involved in the problem, their interconnections, and how they have been changing over time</li> </ul>                                                                                                                          | <ul style="list-style-type: none"> <li>- Collectively generated model of the problem space</li> <li>- Shared mental model of the system</li> <li>- Understanding of how the system has evolved so far and in response to what mechanisms and events</li> </ul>                       | <ul style="list-style-type: none"> <li>- Interview key informants</li> <li>- Group model building</li> <li>- Causal loop diagram</li> </ul>                                                                                                                                                                                                                                                              |
| Envision system-wide changes             | <ul style="list-style-type: none"> <li>- Co-create shared vision of future</li> <li>- Identify potential points of action and resistance</li> <li>- Map and review evidence, lessons, and practices</li> <li>- Co-design actions</li> <li>- Secure resources and accountability</li> <li>- Agree implementation roadmap</li> </ul> | <ul style="list-style-type: none"> <li>- Vision of future</li> <li>- Theory of change</li> <li>- Set of informed, collective, coordinated actions</li> <li>- Implementation roadmap</li> </ul>                                                                                       | <ul style="list-style-type: none"> <li>- Group model building</li> <li>- Structured decision making</li> <li>- Scenario modelling</li> <li>- Adaptive policy approaches</li> <li>- Evidence-based practice approaches</li> <li>- Knowledge-to-action framework</li> <li>- Public participation approaches</li> </ul>                                                                                     |
| Effect system-wide changes               | <ul style="list-style-type: none"> <li>- Implementation of coordinate actions by multisectoral team</li> <li>- Active engagement to increase reach and adoption within the system</li> </ul>                                                                                                                                       | <ul style="list-style-type: none"> <li>- Changes in the drivers of the problem and in the form and function of the system</li> <li>- Buy-in by target population</li> <li>- Adoption of new habits</li> <li>- New social norms</li> </ul>                                            | <ul style="list-style-type: none"> <li>- Evidence-based practice approaches</li> <li>- Knowledge-to-action framework</li> <li>- Public participation approaches</li> <li>- Consolidated Framework for Implementation Research</li> <li>- Diffusion of innovation</li> <li>- Reach, Effectiveness, Adoption, Implementation, and Maintenance (RE-AIM) framework</li> <li>- Adaptive management</li> </ul> |
| Monitor, learn, and adapt                | <ul style="list-style-type: none"> <li>- Multipronged data collection</li> <li>- Data analysis and interpretation</li> <li>- Communicate findings</li> <li>- Elicit collective lessons</li> <li>- Identify areas for strengthening</li> <li>- Adapt implementation roadmap</li> </ul>                                              | <ul style="list-style-type: none"> <li>- Monitoring of the implementation</li> <li>- Lessons on how the system is reacting to changes, why, and for whom</li> <li>- Updated shared mental model</li> <li>- Tuning and adaptation of implementation roadmap</li> </ul>                | <ul style="list-style-type: none"> <li>- Network analysis</li> <li>- Knowledge-to-action framework</li> <li>- Public participation approaches</li> <li>- Adaptive management</li> <li>- Data capture</li> <li>- Generative causation methods</li> <li>- Statistical approaches</li> <li>- Qualitative comparative analysis</li> </ul>                                                                    |
| Scale and sustain                        | <ul style="list-style-type: none"> <li>- Define adaptation tipping points and adaptation pathways</li> <li>- Secure resources and accountability</li> <li>- Enable self-organization and decentralization of decision making</li> </ul>                                                                                            | <ul style="list-style-type: none"> <li>- System's new form and function</li> <li>- Incorporation of new habits and norms</li> <li>- Process in place to avoid returning to undesired condition and control unintended consequences</li> </ul>                                        | <ul style="list-style-type: none"> <li>- Scenario modelling</li> <li>- Adaptive policy approaches</li> <li>- Public participation approaches</li> <li>- Networked governance</li> </ul>                                                                                                                                                                                                                  |
